# Supplementary material for: Development of an HPLC-PDA Method for the Determination of Capsanthin, Zeaxanthin, Lutein, β-Cryptoxanthin and β-Carotene Simultaneously in Chili Peppers and Products
Source: MDPI journal article supplement (doi:10.3390/molecules28052362), 2023-03-03
Supplement: s1 [file s1]

Table S1 Five elution gradients of mobile phase A (acetone) and mobile phase B (water)

| Method 1                              |       |       |
|---------------------------------------|-------|-------|
| Time / min                            | A / % | B / % |
| 0                                     | 30    | 70    |
| 5                                     | 30    | 70    |
| 10                                    | 85    | 15    |
| 17                                    | 85    | 15    |
| 22                                    | 100   | 0     |
| 27                                    | 30    | 70    |
| Method 2                              |       |       |
| Time / min                            | A / % | B / % |
| 0                                     | 55    | 45    |
| 5                                     | 65    | 35    |
| 7                                     | 75    | 25    |
| 10                                    | 85    | 15    |
| 16                                    | 55    | 45    |
| Method 3                              |       |       |
| Time / min                            | A / % | B / % |
| 0                                     | 55    | 45    |
| 5                                     | 55    | 35    |
| 15                                    | 75    | 25    |
| 22                                    | 85    | 15    |
| 27                                    | 55    | 45    |
| Method 4                              |       |       |
| Time / min                            | A / % | B / % |
| 0                                     | 90    | 10    |
| 2                                     | 90    | 10    |
| 10                                    | 80    | 20    |
| 20                                    | 30    | 70    |
| 22                                    | 0     | 100   |
| 27                                    | 90    | 10    |
| Method 5<br>Isocratic elution, 90% A. |       |       |
| Method 6                              |       |       |
| Time / min                            | A / % | B / % |
| 0                                     | 75    | 25    |
| 5                                     | 75    | 25    |
| 10                                    | 95    | 5     |
| 17                                    | 95    | 5     |
| 22                                    | 100   | 0     |
| 27                                    | 75    | 25    |

Table S2 Repeatability test results among four sessions of three groups of mixed standard samples of different concentrations in 14 days (n=6)

|                    | Storage<br>time / d | Capsanthin                |                         | Zeaxanthin                   |                         | Lutein                       |                         | $\beta$ -cryptoxanthin       |                         | $\beta$ -carotene            |                         |
|--------------------|---------------------|---------------------------|-------------------------|------------------------------|-------------------------|------------------------------|-------------------------|------------------------------|-------------------------|------------------------------|-------------------------|
|                    |                     | RSD% of<br>retention time | RSD%<br>of peak<br>area | RSD% of<br>retention<br>time | RSD%<br>of peak<br>area |
| 1 $\mu\text{g/mL}$ | 0                   | 0.04                      | 1.10                    | 0.15                         | 0.48                    | 0.29                         | 1.13                    | 0.11                         | 0.37                    | 0.07                         | 0.33                    |
|                    | 3                   | 0.22                      | 0.93                    | 0.10                         | 0.67                    | 0.08                         | 1.17                    | 0.17                         | 0.37                    | 0.08                         | 0.14                    |
|                    | 7                   | 0.17                      | 0.39                    | 0.14                         | 0.75                    | 0.15                         | 1.23                    | 0.08                         | 0.40                    | 0.08                         | 0.37                    |
|                    | 14                  | 0.07                      | 0.33                    | 0.14                         | 0.28                    | 0.08                         | 1.39                    | 0.11                         | 0.45                    | 0.07                         | 0.39                    |
| 2 $\mu\text{g/mL}$ | 0                   | 0.12                      | 0.26                    | 0.05                         | 0.35                    | 0.05                         | 0.94                    | 0.10                         | 0.30                    | 0.05                         | 0.46                    |
|                    | 3                   | 0.19                      | 0.19                    | 0.12                         | 0.34                    | 0.15                         | 0.47                    | 0.09                         | 0.36                    | 0.05                         | 0.46                    |
|                    | 7                   | 0.22                      | 0.23                    | 0.06                         | 0.32                    | 0.08                         | 0.97                    | 0.08                         | 0.39                    | 0.08                         | 0.61                    |
|                    | 14                  | 0.16                      | 0.16                    | 0.11                         | 0.20                    | 0.16                         | 0.97                    | 0.09                         | 0.36                    | 0.08                         | 0.64                    |
| 5 $\mu\text{g/mL}$ | 0                   | 0.07                      | 0.47                    | 0.10                         | 0.15                    | 0.08                         | 0.54                    | 0.12                         | 0.63                    | 0.06                         | 0.55                    |
|                    | 3                   | 0.08                      | 1.46                    | 0.06                         | 0.12                    | 0.13                         | 0.43                    | 0.09                         | 0.50                    | 0.05                         | 0.65                    |
|                    | 7                   | 0.15                      | 1.43                    | 0.09                         | 0.13                    | 0.07                         | 0.59                    | 0.07                         | 0.89                    | 0.03                         | 0.75                    |
|                    | 14                  | 0.10                      | 1.09                    | 0.13                         | 0.10                    | 0.12                         | 0.31                    | 0.10                         | 0.51                    | 0.06                         | 1.01                    |

Table S3 Recovery rate test results of 5 carotenoids in fresh chili peppers, dried chili peppers, fried chili sauce and fermented chili sauce

| Sample                | Compound name   | 1 mg/kg                |               |               | 5 mg/kg                |               |               | 10 mg/kg               |               |               |
|-----------------------|-----------------|------------------------|---------------|---------------|------------------------|---------------|---------------|------------------------|---------------|---------------|
|                       |                 | Average recovery rate% | Intraday RSD% | Interday RSD% | Average recovery rate% | Intraday RSD% | Interday RSD% | Average recovery rate% | Intraday RSD% | Interday RSD% |
| Fresh chili peppers   | Capsanthin      | 99.28±3.70             | 1.01          | 3.72          | 100.96±6.39            | 0.88          | 6.33          | 99.60±6.41             | 0.78          | 6.44          |
|                       | Zeaxanthin      | 99.60±6.41             | 0.98          | 1.25          | 100.73±1.25            | 0.45          | 2.08          | 102.28±2.12            | 0.60          | 3.50          |
|                       | Lutein          | 91.51±1.22             | 0.48          | 1.33          | 94.05±1.95             | 1.07          | 2.07          | 95.90±4.29             | 0.77          | 4.47          |
|                       | β-cryptoxanthin | 95.51±3.30             | 0.75          | 3.46          | 96.98±4.25             | 1.10          | 4.38          | 98.48±3.02             | 2.27          | 3.06          |
|                       | β-carotene      | 98.35±4.78             | 0.57          | 4.86          | 97.80±4.02             | 0.62          | 4.11          | 99.00±2.16             | 1.13          | 2.18          |
| Dried chili peppers   | Capsanthin      | 90.35±2.25             | 0.93          | 2.48          | 87.80±1.26             | 0.24          | 1.44          | 101.35±4.34            | 0.63          | 4.29          |
|                       | Zeaxanthin      | 102.07±3.17            | 0.88          | 3.11          | 97.07±1.33             | 1.01          | 1.37          | 98.10±3.26             | 0.65          | 3.32          |
|                       | Lutein          | 99.77±2.28             | 0.64          | 2.28          | 100.14±2.29            | 0.21          | 2.29          | 97.32±2.98             | 0.87          | 3.07          |
|                       | β-cryptoxanthin | 96.76±4.86             | 0.45          | 5.02          | 95.24±2.88             | 0.09          | 3.02          | 98.38±2.49             | 0.89          | 2.52          |
|                       | β-carotene      | 97.22±3.39             | 0.98          | 3.49          | 95.00±1.57             | 0.49          | 1.65          | 99.03±2.01             | 0.97          | 2.04          |
| Fried chili sauce     | Capsanthin      | 92.47±2.52             | 1.47          | 2.72          | 98.69±5.74             | 0.43          | 5.81          | 107.47±3.77            | 0.64          | 3.51          |
|                       | Zeaxanthin      | 97.44±3.35             | 0.89          | 3.44          | 100.56±1.80            | 0.20          | 1.79          | 99.14±4.10             | 0.38          | 4.13          |
|                       | Lutein          | 96.91±2.67             | 0.38          | 2.75          | 99.56±2.38             | 1.26          | 2.39          | 99.32±6.62             | 0.08          | 6.66          |
|                       | β-cryptoxanthin | 98.13±6.63             | 0.86          | 6.76          | 98.80±0.88             | 1.18          | 0.89          | 97.61±4.34             | 0.12          | 4.44          |
|                       | β-carotene      | 96.61±5.16             | 1.14          | 5.34          | 97.60±3.72             | 1.25          | 3.82          | 97.56±3.32             | 1.08          | 3.40          |
| Fermented chili sauce | Capsanthin      | 103.31±1.99            | 1.86          | 1.93          | 99.08±7.47             | 0.84          | 7.54          | 102.67±5.59            | 0.27          | 5.45          |
|                       | Zeaxanthin      | 103.19±5.43            | 0.99          | 5.26          | 97.20±3.63             | 0.99          | 3.74          | 97.14±2.25             | 0.29          | 2.31          |
|                       | Lutein          | 98.38±3.35             | 0.38          | 3.40          | 99.53±4.64             | 1.19          | 4.66          | 98.90±3.27             | 1.52          | 3.30          |
|                       | β-cryptoxanthin | 98.93±2.48             | 0.86          | 2.50          | 101.40±5.26            | 0.52          | 5.19          | 99.02±5.18             | 0.53          | 5.23          |
|                       | β-carotene      | 97.97±2.86             | 1.09          | 2.92          | 97.61±2.37             | 1.04          | 2.42          | 95.43±1.66             | 2.18          | 1.74          |

(Note: Average recovery rate% was the average of 18 samples (n=6 / day) in three days which was expressed as mean ± standard deviation.)

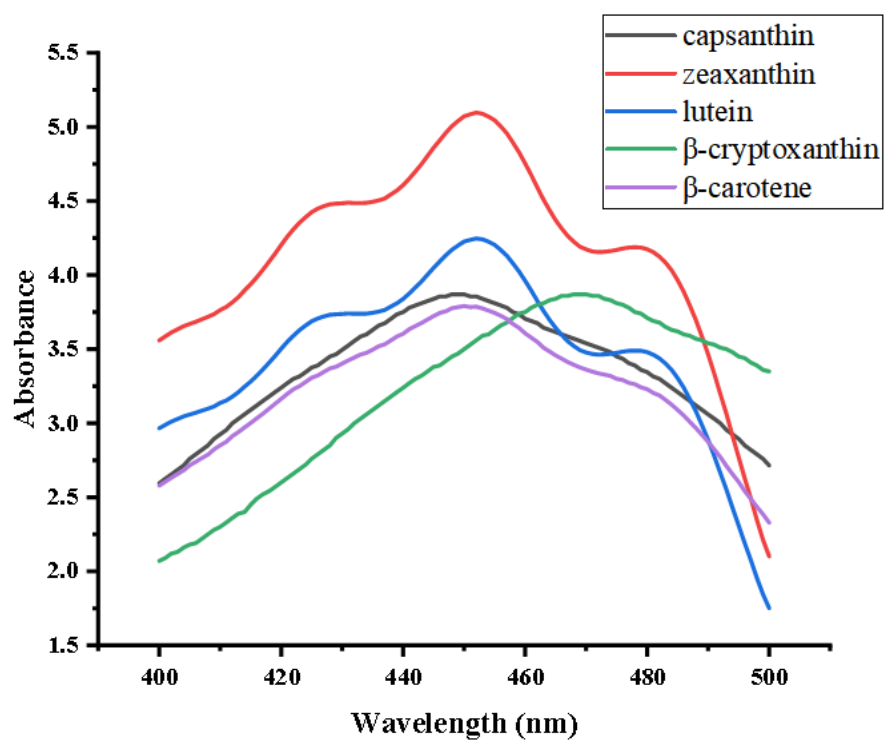

Figure. S1. UV absorption spectra of 5 standards in acetone, obtained by the DAD detector (400~500 nm).

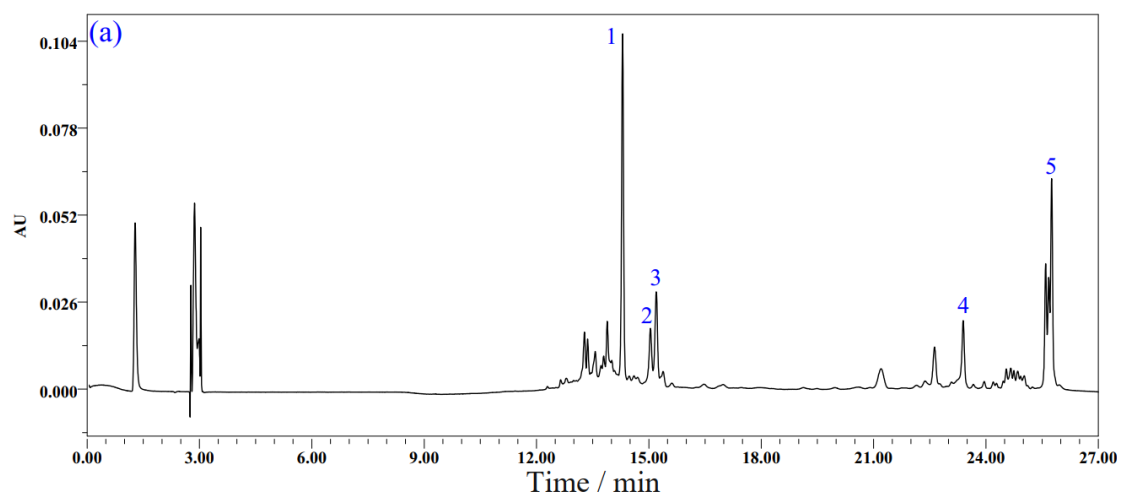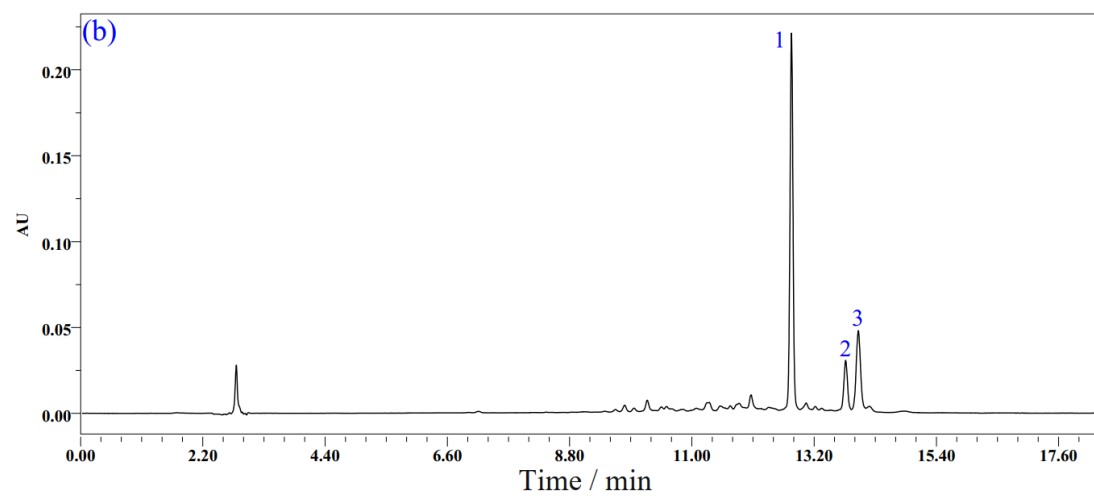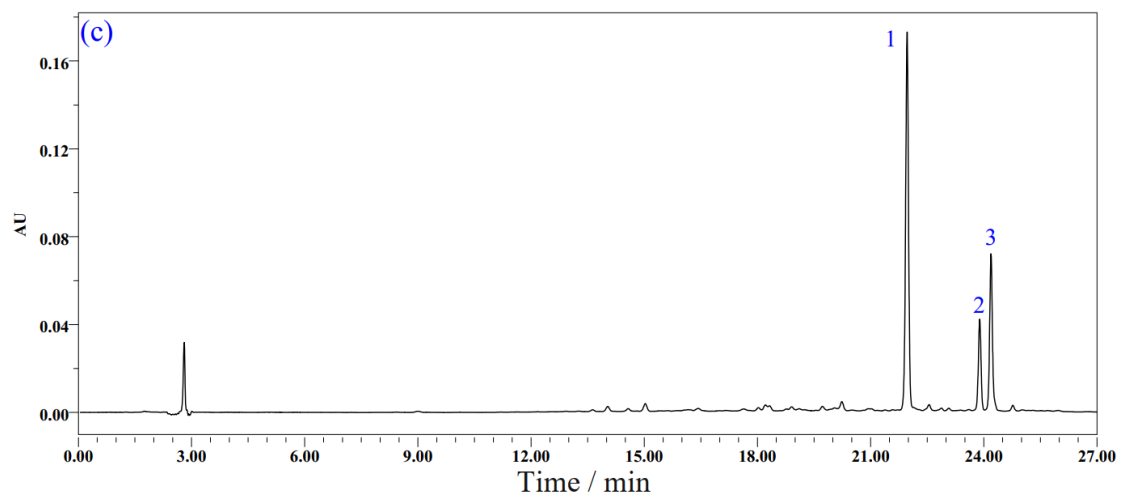

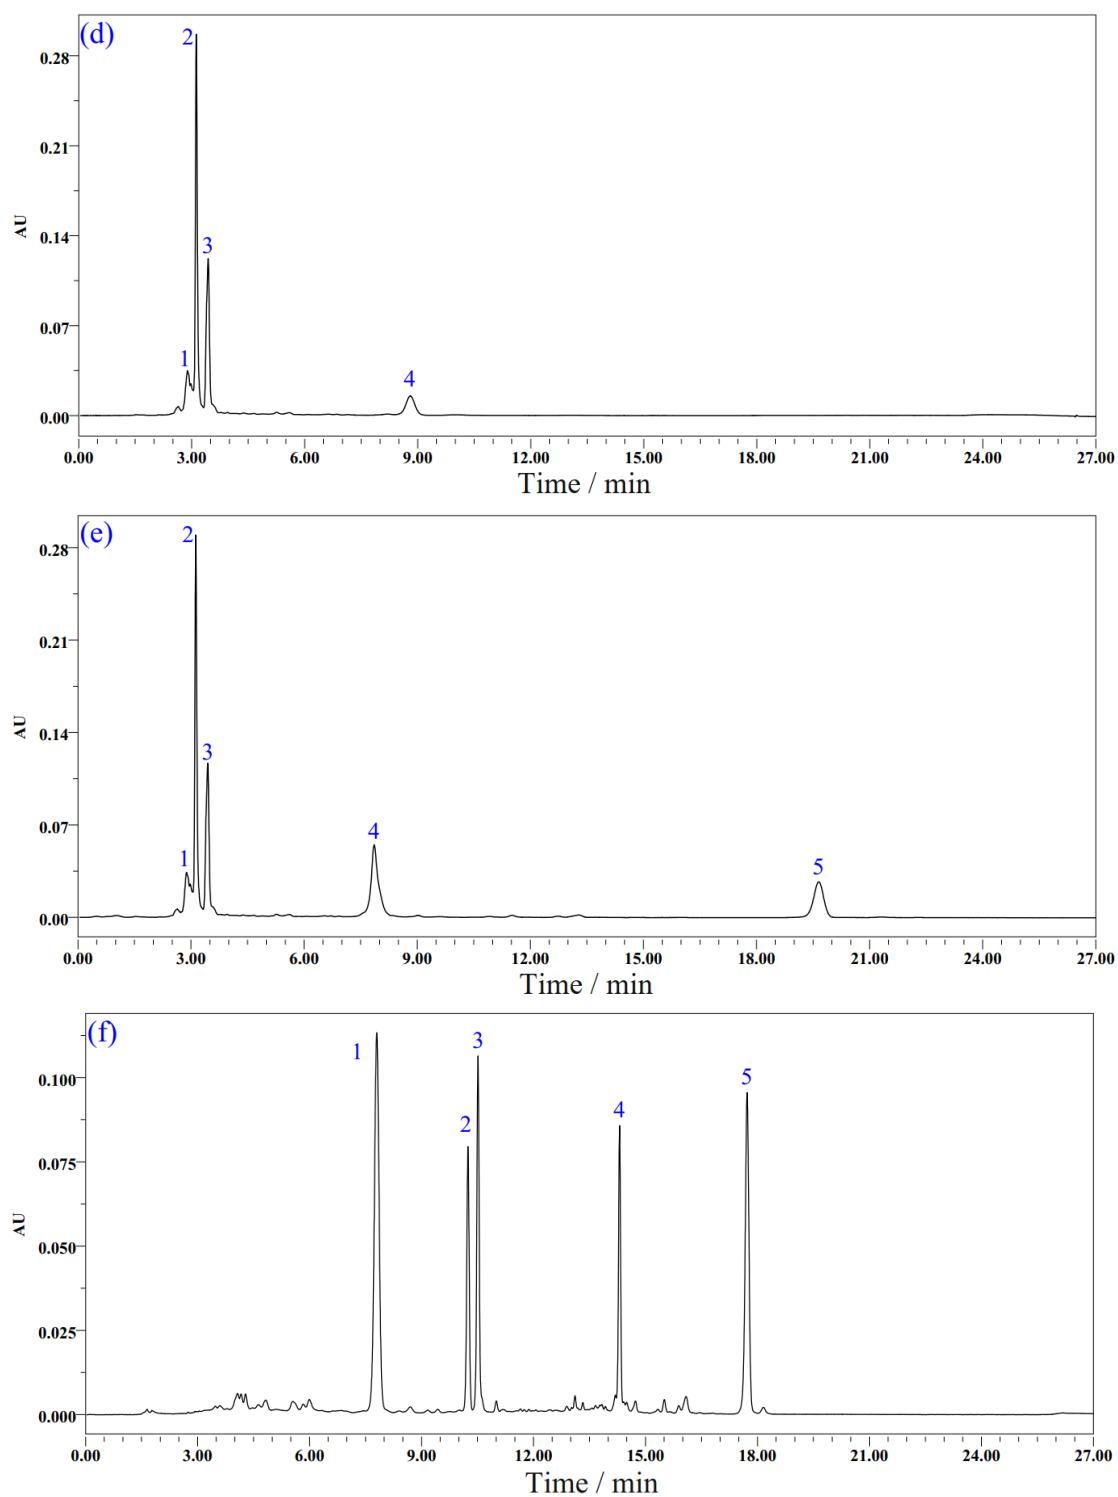

Figure. S2. Chromatograms of capsanthin, zeaxanthin, lutein,  $\beta$ -cryptoxanthin and  $\beta$ -carotene under different gradient elution

(1: capsanthin, 2: zeaxanthin, 3: lutein, 4:  $\beta$ -cryptoxanthin, 5:  $\beta$ -carotene;  
a: method 1, b: method 2, c: method 3, d: method 4, e: method 5, f: method 6)

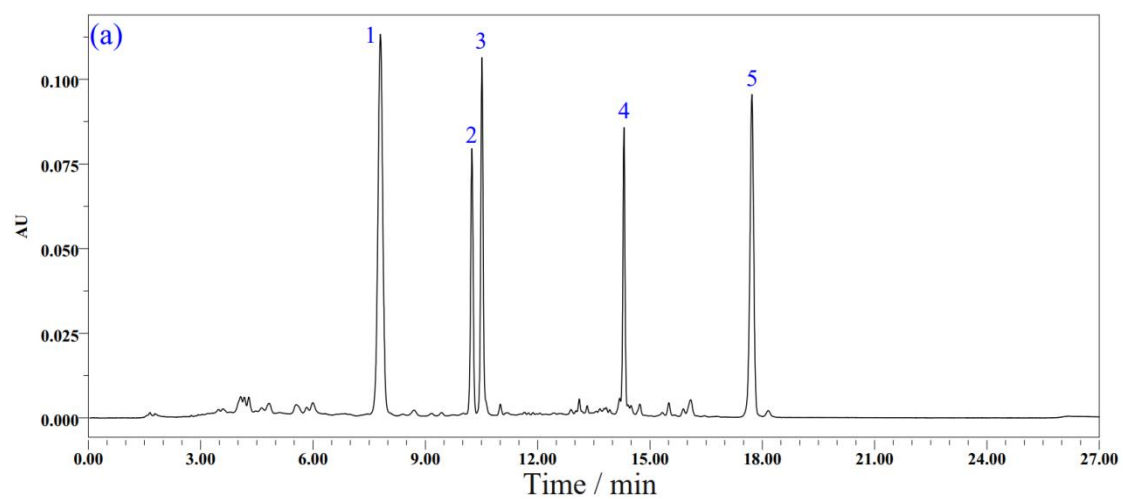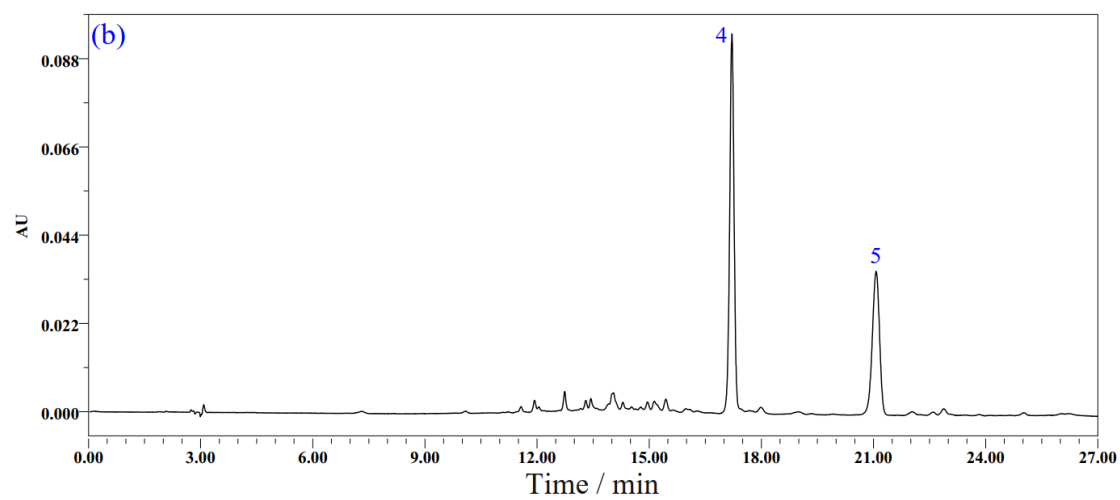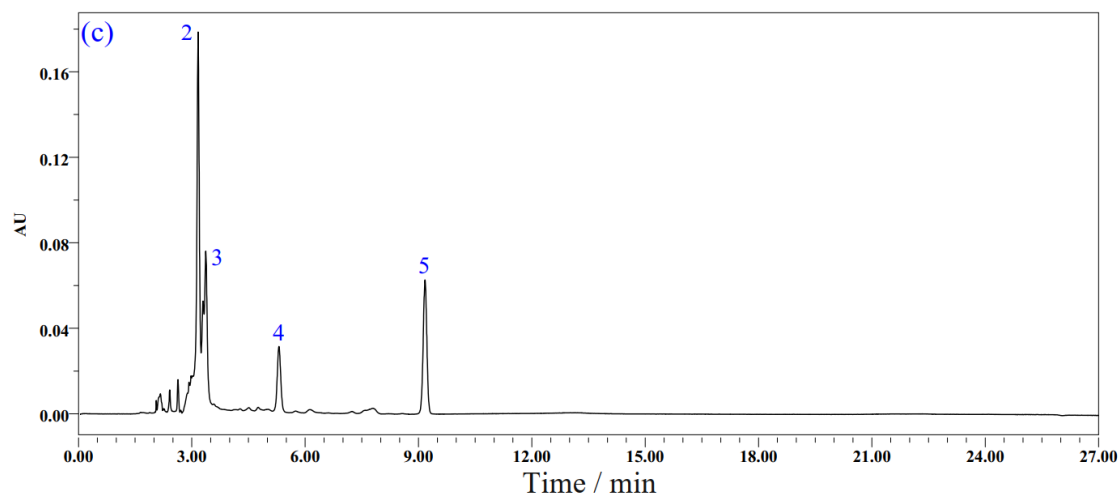

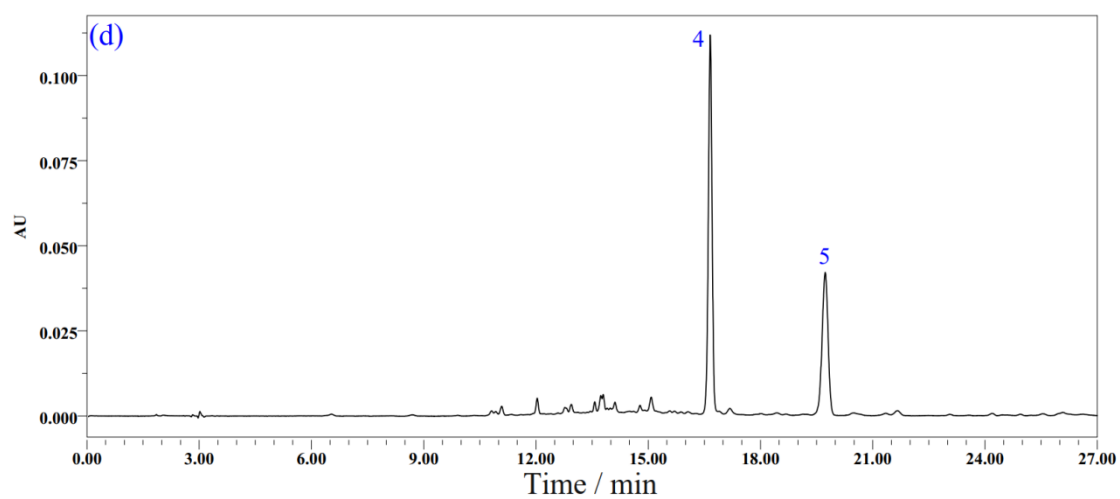

Figure. S3. Chromatograms of capsanthin, zeaxanthin, lutein,  $\beta$ -cryptoxanthin and  $\beta$ -carotene eluted by different mobile phases(a: acetone-water, b: MeOH-water, c: b: tetrahydrofuran-water, d: acetonitrile-water)



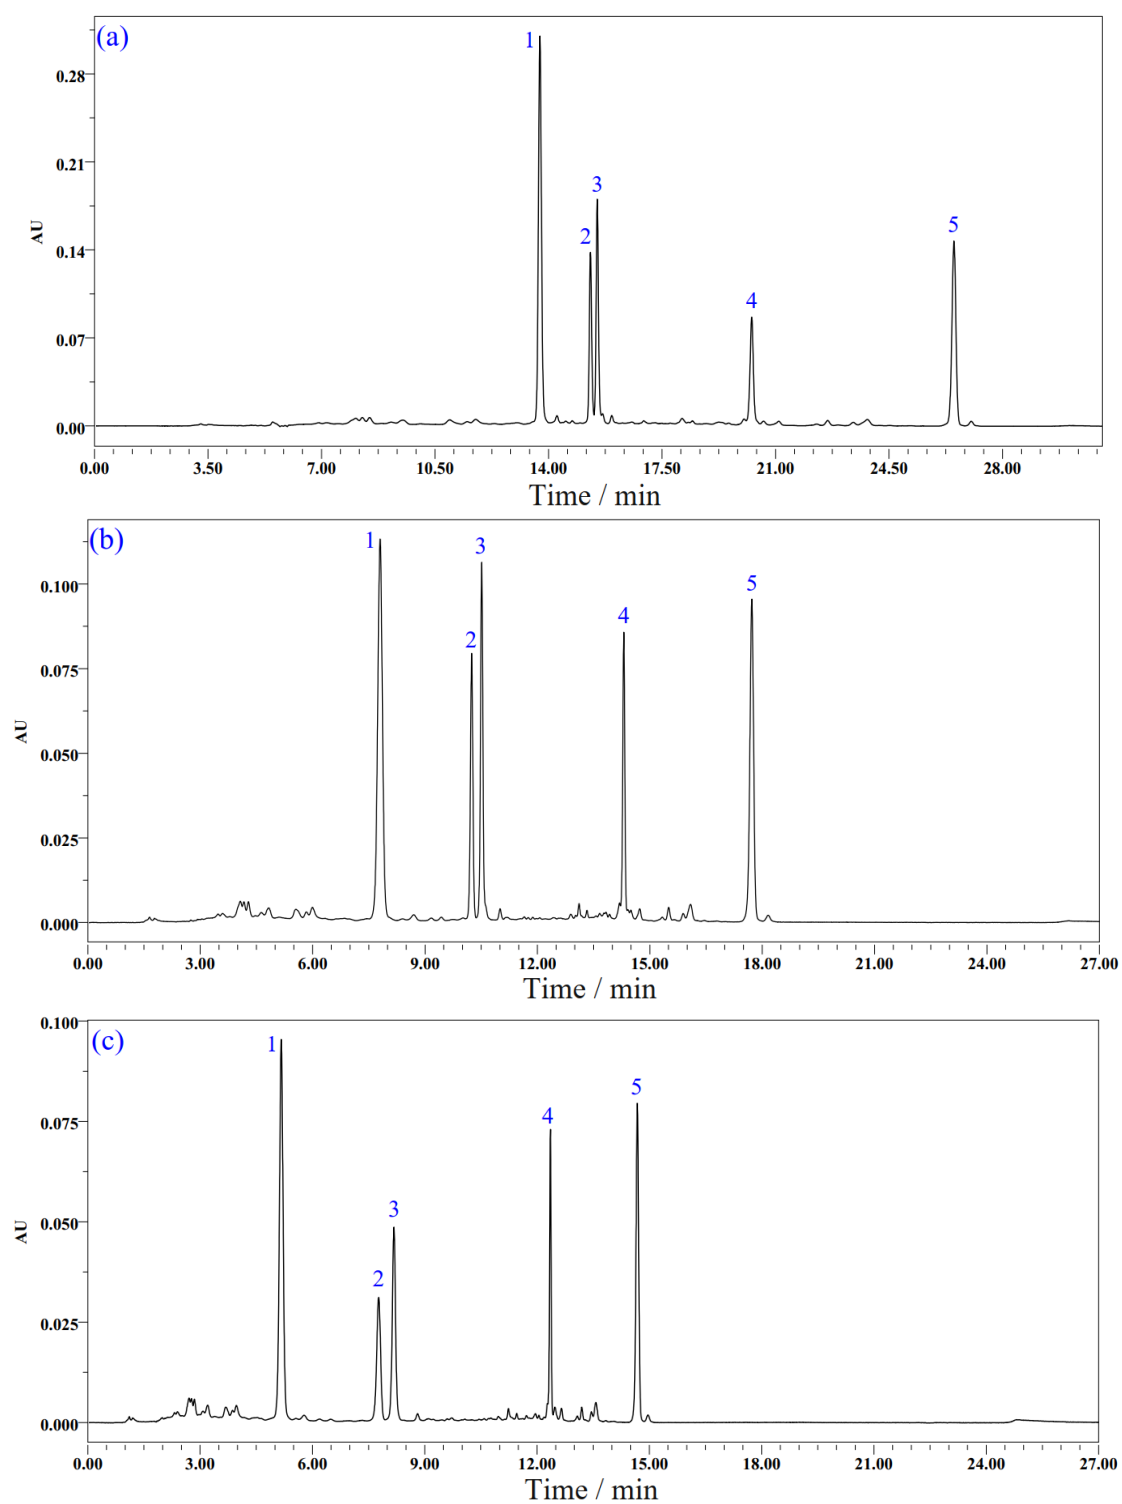

Figure. S4. Chromatograms of capsanthin, zeaxanthin, lutein,  $\beta$ -cryptoxanthin and  $\beta$ -carotene eluted at different flow rates(1: capsanthin, 2: zeaxanthin, 3: lutein, 4:  $\beta$ -cryptoxanthin, 5:  $\beta$ -carotene; a: 0.5 mL/min, b: 1.0 mL/min, c: 1.5 mL/min)

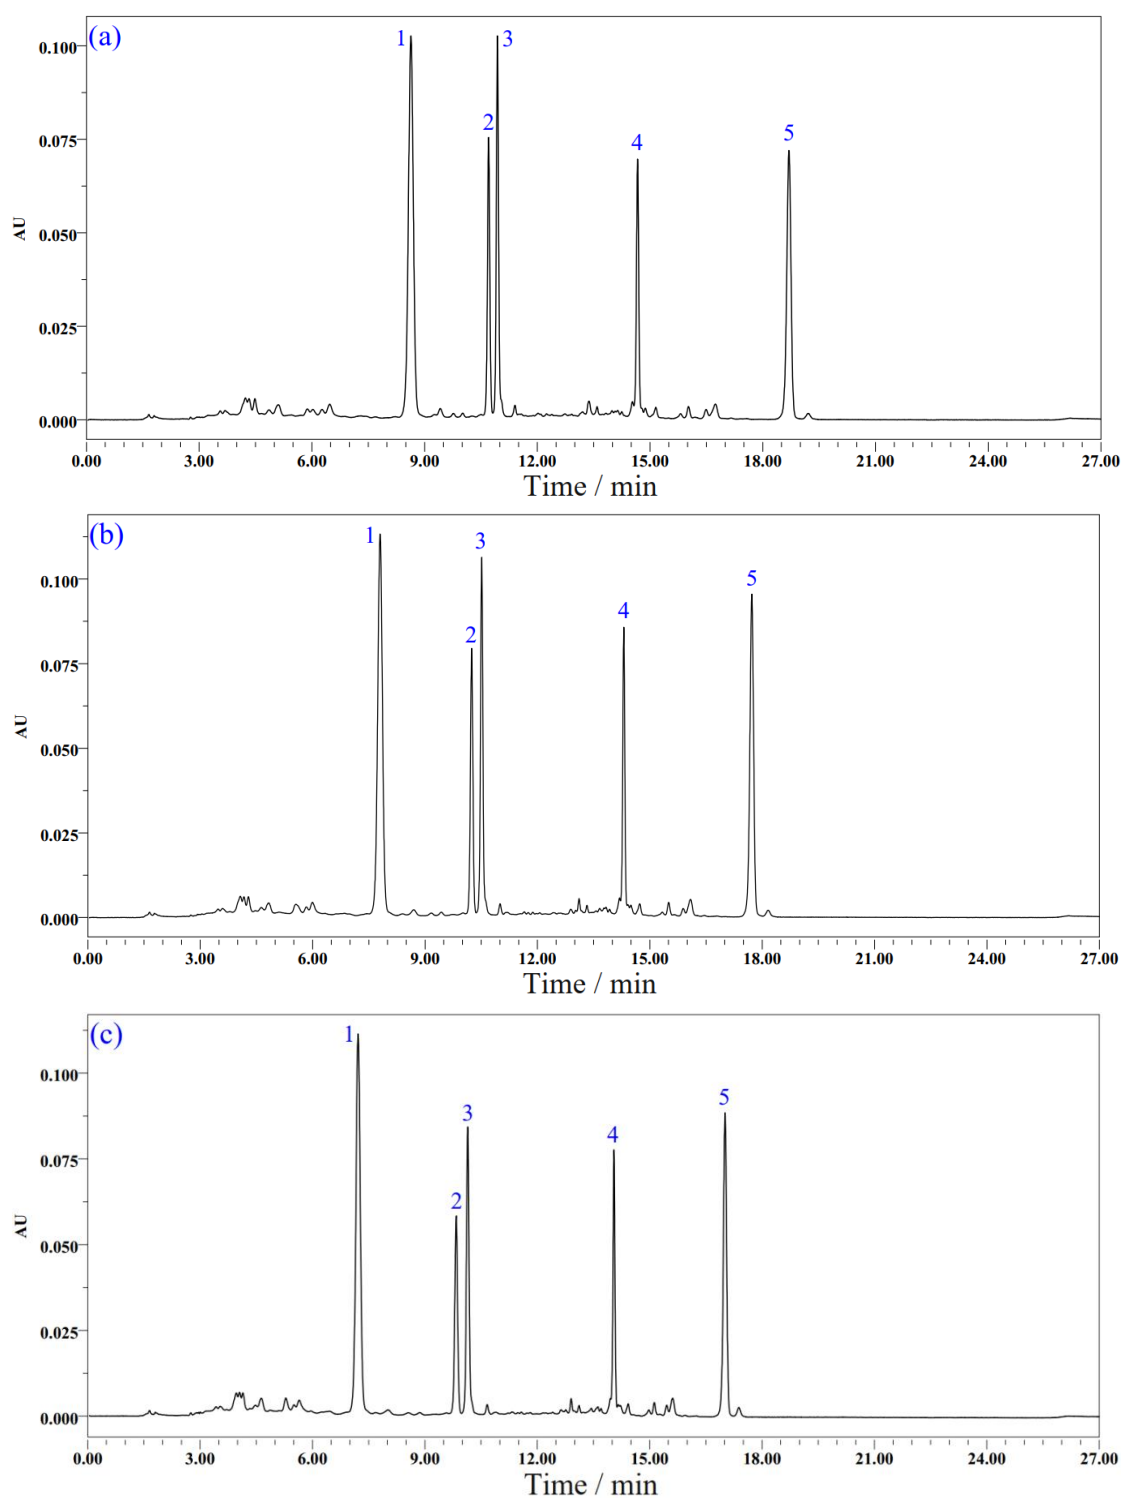

Figure.S5. Chromatograms of capsanthin, zeaxanthin, lutein,  $\beta$ -cryptoxanthin and  $\beta$ -carotene eluted at different column temperatures(1: capsanthin, 2: zeaxanthin, 3: lutein, 4:  $\beta$ -cryptoxanthin, 5:  $\beta$ -carotene; a: 25 °C, b: 30 °C, c: 35 °C)
